# Supplementary material for: Associations between serum metabolites and subclinical atherosclerosis in a Chinese population: the Taizhou Imaging Study
Source: Aging (Albany NY). 2020 Jul 9;12(15):15302–13. doi: 10.18632/aging.103456 (PMC7467377; doi:10.18632/aging.103456)
Supplement: Supplementary Table 1 [file aging-12-103456-s002..docx]

**Supplementary Table 1. Partial Spearman correlations among serum metabolites in the Taizhou Imaging Study.**

|  | Asparagine | Glutamate | Glycine | Histidine | Isoleucine | Lysine | Leucine | Phenylalanine | Tyrosine |
| --- | --- | --- | --- | --- | --- | --- | --- | --- | --- |
| Alanine | 0.60*** | 0.67*** | 0.35*** | 0.50*** | 0.55*** | 0.60*** | 0.65*** | 0.43*** | 0.51*** |
| Asparagine | 1.00 | 0.68*** | 0.63*** | 0.77*** | 0.56*** | 0.71*** | 0.64*** | 0.50*** | 0.45*** |
| Glutamate |  | 1.00 | 0.46*** | 0.57*** | 0.65*** | 0.75*** | 0.75*** | 0.63*** | 0.46*** |
| Glycine |  |  | 1.00 | 0.59*** | 0.37*** | 0.44*** | 0.34*** | 0.43*** | 0.32*** |
| Histidine |  |  |  | 1.00 | 0.48*** | 0.62*** | 0.56*** | 0.54*** | 0.48*** |
| Isoleucine |  |  |  |  | 1.00 | 0.81*** | 0.85*** | 0.50*** | 0.38*** |
| Lysine |  |  |  |  |  | 1.00 | 0.85*** | 0.62*** | 0.51*** |
| Leucine |  |  |  |  |  |  | 1.00 | 0.54*** | 0.45*** |
| Phenylalanine |  |  |  |  |  |  |  | 1.00 | 0.54*** |
| Tyrosine |  |  |  |  |  |  |  |  | 1.00 |

(Table S1 Continued)

|  | Valine | Glutamine | Formate | Acetate | Creatine | Glucose | Pyruvate | Citrate | Succinate | Fumarate | Lactate |
| --- | --- | --- | --- | --- | --- | --- | --- | --- | --- | --- | --- |
| Alanine | 0.58*** | 0.40*** | 0.07 | 0.40*** | 0.46*** | 0.54*** | 0.61*** | 0.44*** | 0.34*** | 0.04 | 0.56*** |
| Asparagine | 0.61*** | 0.72*** | 0.16*** | 0.65*** | 0.65*** | 0.59*** | 0.40*** | 0.75*** | 0.74*** | 0.04 | 0.40*** |
| Glutamate | 0.69*** | 0.39*** | 0.12* | 0.59*** | 0.63*** | 0.50*** | 0.67*** | 0.49*** | 0.59*** | 0.02 | 0.71*** |
| Glycine | 0.35*** | 0.62*** | 0.06 | 0.44*** | 0.55*** | 0.34*** | 0.24*** | 0.53*** | 0.59*** | 0.00 | 0.25*** |
| Histidine | 0.57*** | 0.72*** | 0.26*** | 0.64*** | 0.61*** | 0.53*** | 0.30*** | 0.71*** | 0.64*** | 0.08 | 0.31*** |
| Isoleucine | 0.82*** | 0.34*** | 0.04 | 0.56*** | 0.53*** | 0.52*** | 0.41*** | 0.37*** | 0.49*** | -0.06 | 0.37*** |
| Lysine | 0.85*** | 0.49*** | 0.05 | 0.76*** | 0.66*** | 0.55*** | 0.39*** | 0.50*** | 0.63*** | 0.01 | 0.45*** |
| Leucine | 0.88*** | 0.35*** | 0.06 | 0.59*** | 0.56*** | 0.59*** | 0.45*** | 0.43*** | 0.54*** | 0.02 | 0.48*** |
| Phenylalanine | 0.53*** | 0.39*** | 0.17*** | 0.53*** | 0.54*** | 0.30*** | 0.44*** | 0.36*** | 0.52*** | 0.07 | 0.48*** |
| Tyrosine | 0.54*** | 0.44*** | 0.23*** | 0.43*** | 0.47*** | 0.43*** | 0.24*** | 0.33*** | 0.31*** | 0.10* | 0.22*** |
| Valine | 1.00 | 0.39*** | 0.10* | 0.61*** | 0.59*** | 0.56*** | 0.38*** | 0.44*** | 0.50*** | 0.03 | 0.40*** |
| Glutamine |  | 1.00 | 0.23*** | 0.61*** | 0.47*** | 0.49*** | 0.16*** | 0.71*** | 0.66*** | 0.01 | 0.07 |
| Formate |  |  | 1.00 | 0.20*** | 0.21*** | 0.24*** | 0.08 | 0.19*** | 0.12** | 0.11* | 0.00 |
| Acetate |  |  |  | 1.00 | 0.56*** | 0.47*** | 0.26*** | 0.55*** | 0.63*** | 0.01 | 0.23*** |
| Creatine |  |  |  |  | 1.00 | 0.55*** | 0.39*** | 0.46*** | 0.54*** | -0.03 | 0.41*** |
| Glucose |  |  |  |  |  | 1.00 | 0.31*** | 0.52*** | 0.41*** | 0.02 | 0.16*** |
| Pyruvate |  |  |  |  |  |  | 1.00 | 0.28*** | 0.34*** | 0.05 | 0.65*** |
| Citrate |  |  |  |  |  |  |  | 1.00 | 0.70*** | 0.05 | 0.25*** |
| Succinate |  |  |  |  |  |  |  |  | 1.00 | 0.06 | 0.34*** |
| Fumarate |  |  |  |  |  |  |  |  |  | 1.00 | 0.07 |
| Lactate |  |  |  |  |  |  |  |  |  |  | 1.00 |

(Table S1 Continued)

|  | *N*-Acetylated Glycoproteins | *O*-Acetylated Glycoproteins | Acetoacetate | Bile Acids | Choline | Glycerophosphocholine | Phosphorylcholine | Hypoxanthine |
| --- | --- | --- | --- | --- | --- | --- | --- | --- |
| Alanine | 0.65*** | 0.53*** | 0.41*** | 0.44*** | 0.48*** | 0.24*** | 0.49*** | 0.09* |
| Asparagine | 0.69*** | 0.77*** | 0.36*** | 0.28*** | 0.76*** | 0.48*** | 0.72*** | 0.04 |
| Glutamate | 0.77*** | 0.54*** | 0.49*** | 0.35*** | 0.58*** | 0.23*** | 0.56*** | 0.18*** |
| Glycine | 0.43*** | 0.64*** | 0.07 | 0.09 | 0.47*** | 0.37*** | 0.44*** | 0.07 |
| Histidine | 0.54*** | 0.76*** | 0.26*** | 0.26*** | 0.67*** | 0.44*** | 0.64*** | 0.06 |
| Isoleucine | 0.79*** | 0.51*** | 0.57*** | 0.30*** | 0.44*** | 0.20*** | 0.44*** | 0.05 |
| Lysine | 0.75*** | 0.65*** | 0.51*** | 0.22*** | 0.57*** | 0.19*** | 0.51*** | 0.09* |
| Leucine | 0.83*** | 0.52*** | 0.74*** | 0.50*** | 0.60*** | 0.25*** | 0.60*** | 0.08 |
| Phenylalanine | 0.56*** | 0.50*** | 0.24*** | 0.28*** | 0.42*** | 0.14** | 0.36*** | 0.26*** |
| Tyrosine | 0.38*** | 0.50*** | 0.14** | 0.21*** | 0.38*** | 0.20*** | 0.39*** | 0.02 |
| Valine | 0.65*** | 0.53*** | 0.52*** | 0.31*** | 0.57*** | 0.26*** | 0.56*** | 0.05 |
| Glutamine | 0.40*** | 0.94*** | 0.09* | 0.10* | 0.51*** | 0.43*** | 0.49*** | -0.06 |
| Formate | 0.07 | 0.19*** | -0.07 | 0.14** | 0.16*** | 0.18*** | 0.19*** | 0.05 |
| Acetate | 0.54*** | 0.70*** | 0.32*** | 0.19*** | 0.51*** | 0.29*** | 0.49*** | 0.05 |
| Creatine | 0.64*** | 0.55*** | 0.25*** | 0.24*** | 0.55*** | 0.29*** | 0.53*** | 0.14** |
| Glucose | 0.59*** | 0.57*** | 0.39*** | 0.38*** | 0.55*** | 0.39*** | 0.59*** | -0.15** |
| Pyruvate | 0.57*** | 0.27*** | 0.37*** | 0.35*** | 0.31*** | 0.15*** | 0.29*** | 0.21*** |
| Citrate | 0.46*** | 0.69*** | 0.21*** | 0.15** | 0.62*** | 0.45*** | 0.58*** | -0.07 |
| Succinate | 0.57*** | 0.70*** | 0.38*** | 0.19*** | 0.62*** | 0.40*** | 0.54*** | 0.11* |
| Fumarate | -0.06 | 0.01 | -0.02 | 0.09* | 0.08 | 0.06 | 0.06 | 0.16*** |
| Lactate | 0.51*** | 0.20*** | 0.35*** | 0.32*** | 0.35*** | 0.09* | 0.32*** | 0.40*** |
| *N*-Acetylated Glycoproteins | 1.00 | 0.56*** | 0.66*** | 0.52*** | 0.56*** | 0.22*** | 0.54*** | 0.12** |
| *O*-Acetylated Glycoproteins |  | 1.00 | 0.22*** | 0.20*** | 0.55*** | 0.44*** | 0.54*** | -0.02 |
| Acetoacetate |  |  | 1.00 | 0.61*** | 0.40*** | 0.05 | 0.39*** | 0.06 |
| Bile Acids |  |  |  | 1.00 | 0.40*** | 0.27*** | 0.46*** | 0.11* |
| Choline |  |  |  |  | 1.00 | 0.56*** | 0.93*** | 0.12* |
| Glycerophosphocholine |  |  |  |  |  | 1.00 | 0.69*** | -0.07 |
| Phosphorylcholine |  |  |  |  |  |  | 1.00 | 0.06 |
| Hypoxanthine |  |  |  |  |  |  |  | 1.00 |

(Table S1 Continued)

|  | Lipids  (C=CC*H2*C=C) | Lipids  (C*H*=CH) | Lipids  (C*H2*C=C) | Lipids  (C*H2*CH2COO) | Lipids  (C*H2*COO) | Lipids  (R-C*H2*) | Lipids  (R-C*H3*) | Triglycerides | Dimethylglycine |
| --- | --- | --- | --- | --- | --- | --- | --- | --- | --- |
| Alanine | 0.59*** | 0.55*** | 0.61*** | 0.56*** | 0.57*** | 0.54*** | 0.54*** | 0.38*** | 0.51*** |
| Asparagine | 0.49*** | 0.39*** | 0.54*** | 0.38*** | 0.52*** | 0.35*** | 0.45*** | 0.37*** | 0.86*** |
| Glutamate | 0.56*** | 0.48*** | 0.63*** | 0.51*** | 0.63*** | 0.47*** | 0.50*** | 0.40*** | 0.60*** |
| Glycine | 0.18*** | 0.12* | 0.26*** | 0.07 | 0.20*** | 0.07 | 0.18*** | 0.14** | 0.56*** |
| Histidine | 0.37*** | 0.32*** | 0.40*** | 0.25*** | 0.39*** | 0.24*** | 0.35*** | 0.32*** | 0.68*** |
| Isoleucine | 0.60*** | 0.54*** | 0.73*** | 0.59*** | 0.70*** | 0.56*** | 0.56*** | 0.47*** | 0.47*** |
| Lysine | 0.54*** | 0.45*** | 0.65*** | 0.54*** | 0.66*** | 0.48*** | 0.49*** | 0.45*** | 0.64*** |
| Leucine | 0.77*** | 0.72*** | 0.83*** | 0.74*** | 0.85*** | 0.72*** | 0.73*** | 0.57*** | 0.52*** |
| Phenylalanine | 0.33*** | 0.29*** | 0.41*** | 0.24*** | 0.37*** | 0.23*** | 0.29*** | 0.32*** | 0.47*** |
| Tyrosine | 0.26*** | 0.24*** | 0.29*** | 0.21*** | 0.28*** | 0.19*** | 0.23*** | 0.29*** | 0.47*** |
| Valine | 0.54*** | 0.50*** | 0.61*** | 0.53*** | 0.66*** | 0.50*** | 0.52*** | 0.48*** | 0.53*** |
| Glutamine | 0.21*** | 0.15** | 0.25*** | 0.10* | 0.23*** | 0.09* | 0.20*** | 0.19*** | 0.71*** |
| Formate | 0.00 | 0.02 | 0.00 | -0.08 | -0.02 | -0.06 | 0.02 | 0.15** | 0.16*** |
| Acetate | 0.37*** | 0.29*** | 0.42*** | 0.30*** | 0.43*** | 0.26*** | 0.33*** | 0.32*** | 0.64*** |
| Creatine | 0.37*** | 0.30*** | 0.45*** | 0.28*** | 0.41*** | 0.26*** | 0.33*** | 0.23*** | 0.57*** |
| Glucose | 0.50*** | 0.49*** | 0.53*** | 0.43*** | 0.51*** | 0.43*** | 0.50*** | 0.55*** | 0.49*** |
| Pyruvate | 0.45*** | 0.40*** | 0.49*** | 0.41*** | 0.47*** | 0.40*** | 0.40*** | 0.29*** | 0.35*** |
| Citrate | 0.30*** | 0.22*** | 0.32*** | 0.19*** | 0.33*** | 0.18*** | 0.30*** | 0.25*** | 0.69*** |
| Succinate | 0.35*** | 0.26*** | 0.41*** | 0.22*** | 0.45*** | 0.22*** | 0.34*** | 0.32*** | 0.66*** |
| Fumarate | -0.02 | 0.03 | -0.05 | -0.07 | -0.03 | -0.05 | 0.00 | 0.27*** | 0.04 |
| Lactate | 0.40*** | 0.36*** | 0.44*** | 0.38*** | 0.43*** | 0.38*** | 0.37*** | 0.16*** | 0.30*** |
| *N*-Acetylated Glycoproteins | 0.78*** | 0.70*** | 0.89*** | 0.72*** | 0.82*** | 0.70*** | 0.71*** | 0.52*** | 0.58*** |
| *O*-Acetylated Glycoproteins | 0.35*** | 0.29*** | 0.41*** | 0.25*** | 0.37*** | 0.23*** | 0.33*** | 0.30*** | 0.75*** |
| Acetoacetate | 0.85*** | 0.84*** | 0.84*** | 0.89*** | 0.93*** | 0.87*** | 0.81*** | 0.54*** | 0.26*** |
| Bile Acids | 0.70*** | 0.81*** | 0.65*** | 0.61*** | 0.62*** | 0.70*** | 0.75*** | 0.52*** | 0.17*** |
| Choline | 0.48*** | 0.45*** | 0.49*** | 0.37*** | 0.51*** | 0.38*** | 0.50*** | 0.43*** | 0.61*** |
| Glycerophosphocholine | 0.24*** | 0.26*** | 0.21*** | 0.05 | 0.14** | 0.17*** | 0.40*** | 0.19*** | 0.37*** |
| Phosphorylcholine | 0.52*** | 0.51*** | 0.52*** | 0.40*** | 0.50*** | 0.44*** | 0.58*** | 0.40*** | 0.58*** |
| Hypoxanthine | 0.06 | 0.06 | 0.08 | 0.04 | 0.07 | 0.04 | 0.04 | 0.02 | 0.04 |
| Lipids (C=CC*H2*C=C) | 1.00 | 0.96*** | 0.94*** | 0.93*** | 0.91*** | 0.95*** | 0.94*** | 0.57*** | 0.37*** |
| Lipids (C*H*=CH) |  | 1.00 | 0.91*** | 0.90*** | 0.87*** | 0.96*** | 0.96*** | 0.62*** | 0.28*** |
| Lipids (C*H2*C=C) |  |  | 1.00 | 0.92*** | 0.93*** | 0.93*** | 0.91*** | 0.59*** | 0.42*** |
| Lipids (C*H2*CH2COO) |  |  |  | 1.00 | 0.93*** | 0.97*** | 0.87*** | 0.51*** | 0.28*** |
| Lipids (C*H2*COO) |  |  |  |  | 1.00 | 0.90*** | 0.86*** | 0.56*** | 0.41*** |
| Lipids (R-C*H2*) |  |  |  |  |  | 1.00 | 0.95*** | 0.53*** | 0.25*** |
| Lipids (R-C*H3*) |  |  |  |  |  |  | 1.00 | 0.55*** | 0.34*** |
| Triglycerides |  |  |  |  |  |  |  | 1.00 | 0.27*** |
| Dimethylglycine |  |  |  |  |  |  |  |  | 1.00 |

The significance threshold was set at **P* <0.05, ***P* <0.01, and ****P* <0.001 after false discovery rate correction.
