# Supplementary material for: Associations between serum metabolites and subclinical atherosclerosis in a Chinese population: the Taizhou Imaging Study
Source: Aging (Albany NY). 2020 Jul 9;12(15):15302–13. doi: 10.18632/aging.103456 (PMC7467377; doi:10.18632/aging.103456)
Supplement: Supplementary Table 2 [file aging-12-103456-s001..docx]

**Supplementary Table 2. Partial Spearman correlations between serum metabolites and cardiovascular disease risk factors in the Taizhou Imaging Study.**

| Metabolites | BMI | Exercise | Smoking | SBP | HTDmed | HLP | DM | TC | TG | LDL-C | HDL-C | GLU | CYS-C |
| --- | --- | --- | --- | --- | --- | --- | --- | --- | --- | --- | --- | --- | --- |
| Alanine | 0.24*** | 0.04 | -0.08 | 0.09 | 0.14** | 0.21*** | 0.17*** | 0.11* | 0.39*** | 0.12* | -0.17*** | 0.19*** | 0.04 |
| Asparagine | 0.01 | -0.03 | -0.04 | 0.02 | 0.07 | 0.10 | 0.00 | 0.11* | 0.15** | 0.12 | -0.06 | 0.03 | -0.01 |
| Glutamate | 0.24*** | 0.01 | 0.00 | 0.09 | 0.22*** | 0.22*** | 0.15** | 0.13* | 0.32*** | 0.23*** | -0.14** | 0.09 | -0.03 |
| Glycine | -0.15** | 0.01 | -0.01 | 0.03 | -0.03 | -0.04 | -0.03 | -0.04 | -0.05 | -0.03 | 0.03 | -0.08 | 0.04 |
| Histidine | 0.03 | 0.00 | -0.10 | -0.03 | 0.07 | -0.01 | -0.02 | -0.01 | 0.07 | 0.05 | -0.07 | -0.04 | -0.01 |
| Isoleucine | 0.23*** | -0.02 | -0.04 | 0.09 | 0.15** | 0.20*** | 0.17*** | 0.04 | 0.47*** | -0.03 | -0.22*** | 0.11* | 0.07 |
| Lysine | 0.24*** | 0.01 | -0.06 | 0.12* | 0.18*** | 0.16*** | 0.13** | 0.05 | 0.36*** | 0.01 | -0.22*** | 0.11* | 0.07 |
| Leucine | 0.29*** | 0.02 | -0.06 | 0.14** | 0.22*** | 0.30*** | 0.21*** | 0.14** | 0.58*** | 0.08 | -0.24*** | 0.16** | 0.08 |
| Phenylalanine | 0.16*** | -0.02 | -0.05 | 0.02 | 0.17*** | 0.12* | 0.08 | 0.07 | 0.14** | 0.07 | -0.11* | -0.03 | 0.05 |
| Tyrosine | 0.19*** | 0.07 | -0.11 | 0.03 | 0.10 | 0.01 | 0.05 | -0.05 | 0.08 | 0.00 | -0.14** | 0.11* | 0.02 |
| Valine | 0.30*** | 0.03 | -0.07 | 0.10 | 0.17*** | 0.17*** | 0.16*** | 0.06 | 0.36*** | 0.02 | -0.17*** | 0.15** | 0.03 |
| Glutamine | -0.11* | 0.01 | -0.01 | -0.08 | 0.01 | -0.06 | -0.11* | -0.07 | -0.02 | -0.02 | -0.05 | -0.01 | 0.00 |
| Formate | -0.05 | 0.03 | -0.04 | -0.08 | -0.03 | -0.04 | 0.06 | 0.00 | -0.07 | 0.05 | -0.11* | 0.05 | -0.07 |
| Acetate | -0.02 | 0.00 | -0.01 | -0.07 | 0.08 | 0.03 | -0.01 | 0.04 | 0.14** | 0.08 | -0.13* | -0.02 | 0.05 |
| Creatine | 0.12* | 0.01 | -0.06 | 0.03 | 0.09 | 0.07 | 0.11* | 0.03 | 0.12* | 0.04 | -0.12* | 0.15** | 0.01 |
| Glucose | 0.20*** | 0.04 | -0.08 | 0.08 | 0.13** | 0.16*** | 0.35*** | 0.04 | 0.30*** | 0.04 | -0.21*** | 0.54*** | -0.02 |
| Pyruvate | 0.11* | -0.06 | 0.00 | 0.11* | 0.20*** | 0.19*** | 0.14** | 0.11* | 0.25*** | 0.16** | -0.08 | 0.07 | 0.02 |
| Citrate | -0.09 | 0.00 | -0.03 | -0.07 | -0.03 | 0.01 | -0.04 | 0.06 | 0.01 | 0.08 | 0.02 | 0.01 | 0.11 |
| Succinate | -0.11* | -0.02 | 0.04 | 0.01 | 0.05 | 0.08 | -0.01 | 0.05 | 0.07 | 0.04 | -0.01 | -0.10 | 0.06 |
| Fumarate | -0.09 | 0.01 | -0.07 | -0.07 | 0.01 | 0.06 | 0.01 | 0.08 | -0.12* | -0.01 | 0.10 | 0.00 | 0.01 |
| Lactate | 0.19*** | -0.07 | -0.04 | 0.16** | 0.18*** | 0.22*** | 0.14** | 0.14* | 0.25*** | 0.15* | -0.08 | -0.01 | -0.02 |
| *N*-Acetylated Glycoproteins | 0.21*** | -0.05 | -0.07 | 0.12* | 0.20*** | 0.29*** | 0.17*** | 0.14** | 0.54*** | 0.09 | -0.28*** | 0.14** | 0.11 |
| *O*-Acetylated Glycoproteins | -0.03 | 0.02 | -0.06 | -0.01 | 0.08 | 0.02 | -0.05 | -0.03 | 0.10* | 0.00 | -0.09 | 0.00 | 0.01 |
| Acetoacetate | 0.26*** | 0.02 | -0.04 | 0.16** | 0.20*** | 0.34*** | 0.24*** | 0.13* | 0.74*** | 0.05 | -0.37*** | 0.13* | 0.11 |
| Bile Acids | 0.17*** | 0.02 | -0.05 | 0.05 | 0.13** | 0.32*** | 0.19*** | 0.17** | 0.53*** | 0.14* | -0.21*** | 0.13* | 0.04 |
| Choline | 0.05 | -0.01 | 0.00 | 0.00 | 0.04 | 0.23*** | 0.03 | 0.26*** | 0.17*** | 0.21*** | 0.08 | 0.11* | 0.03 |
| Glycerophosphocholine | -0.21*** | -0.06 | -0.01 | -0.02 | -0.05 | 0.09 | -0.07 | 0.18*** | -0.07 | 0.09 | 0.39*** | -0.01 | -0.07 |
| Phosphorylcholine | 0.04 | -0.02 | -0.01 | 0.00 | 0.05 | 0.23*** | 0.03 | 0.25*** | 0.21*** | 0.21*** | 0.09 | 0.12* | -0.01 |
| Hypoxanthine | -0.03 | -0.06 | 0.02 | 0.02 | 0.07 | 0.11* | 0.04 | 0.13* | 0.00 | 0.07 | 0.03 | -0.11* | 0.03 |
| Lipids (C=CC*H2*C=C) | 0.26*** | 0.00 | -0.06 | 0.13* | 0.20*** | 0.39*** | 0.22*** | 0.22*** | 0.77*** | 0.13* | -0.31*** | 0.15** | 0.10 |
| Lipids (C*H*=CH) | 0.25*** | 0.00 | -0.07 | 0.13* | 0.19*** | 0.39*** | 0.24*** | 0.21*** | 0.76*** | 0.11 | -0.29*** | 0.18** | 0.10 |
| Lipids (C*H2*C=C) | 0.26*** | -0.01 | -0.07 | 0.16** | 0.22*** | 0.36*** | 0.22*** | 0.18*** | 0.76*** | 0.07 | -0.32*** | 0.17** | 0.13 |
| Lipids (C*H2*CH2COO) | 0.34*** | 0.01 | -0.05 | 0.18** | 0.22*** | 0.37*** | 0.25*** | 0.16** | 0.84*** | 0.07 | -0.39*** | 0.20*** | 0.12 |
| Lipids (C*H2*COO) | 0.29*** | 0.00 | -0.04 | 0.16** | 0.22*** | 0.34*** | 0.22*** | 0.14** | 0.75*** | 0.05 | -0.35*** | 0.16** | 0.11 |
| Lipids (R-C*H2*) | 0.29*** | 0.00 | -0.06 | 0.16** | 0.20*** | 0.38*** | 0.24*** | 0.18*** | 0.83*** | 0.07 | -0.32*** | 0.17** | 0.12 |
| Lipids (R-C*H3*) | 0.19*** | -0.03 | -0.04 | 0.12* | 0.17*** | 0.40*** | 0.20*** | 0.23*** | 0.73*** | 0.12 | -0.20*** | 0.15** | 0.10 |
| Triglycerides | 0.23*** | -0.02 | -0.10 | 0.10 | 0.17*** | 0.21*** | 0.31*** | 0.09 | 0.41*** | 0.01 | -0.24*** | 0.25*** | 0.07 |
| Dimethylglycine | 0.01 | 0.00 | 0.00 | -0.01 | 0.07 | 0.03 | -0.06 | 0.04 | 0.09 | 0.09 | -0.12* | 0.02 | 0.04 |

Abbreviations: BMI, body mass index; CYS-C, cystain-C; DM, diabetes mellitus; GLU, glucose; HTDmed, use of antihypertensive medications; HDL–C, high–density lipoprotein cholesterol; HLP, hyperlipidemia; IMT, carotid intima-media thickness; LDL–C, low–density lipoprotein cholesterol; SBP, systolic blood pressure; TC, total cholesterol; TGs, triglycerides. The significance threshold was set at **P* <0.05, ***P* <0.01, and ****P* <0.001 after false discovery rate correction.
